# Supplementary figures and images for: Reductive evolution of architectural repertoires in proteomes and the birth of the tripartite world
Source: HighWire-hosted journal article supplement (doi:10.1101/gr.6454307), 2007-10-01

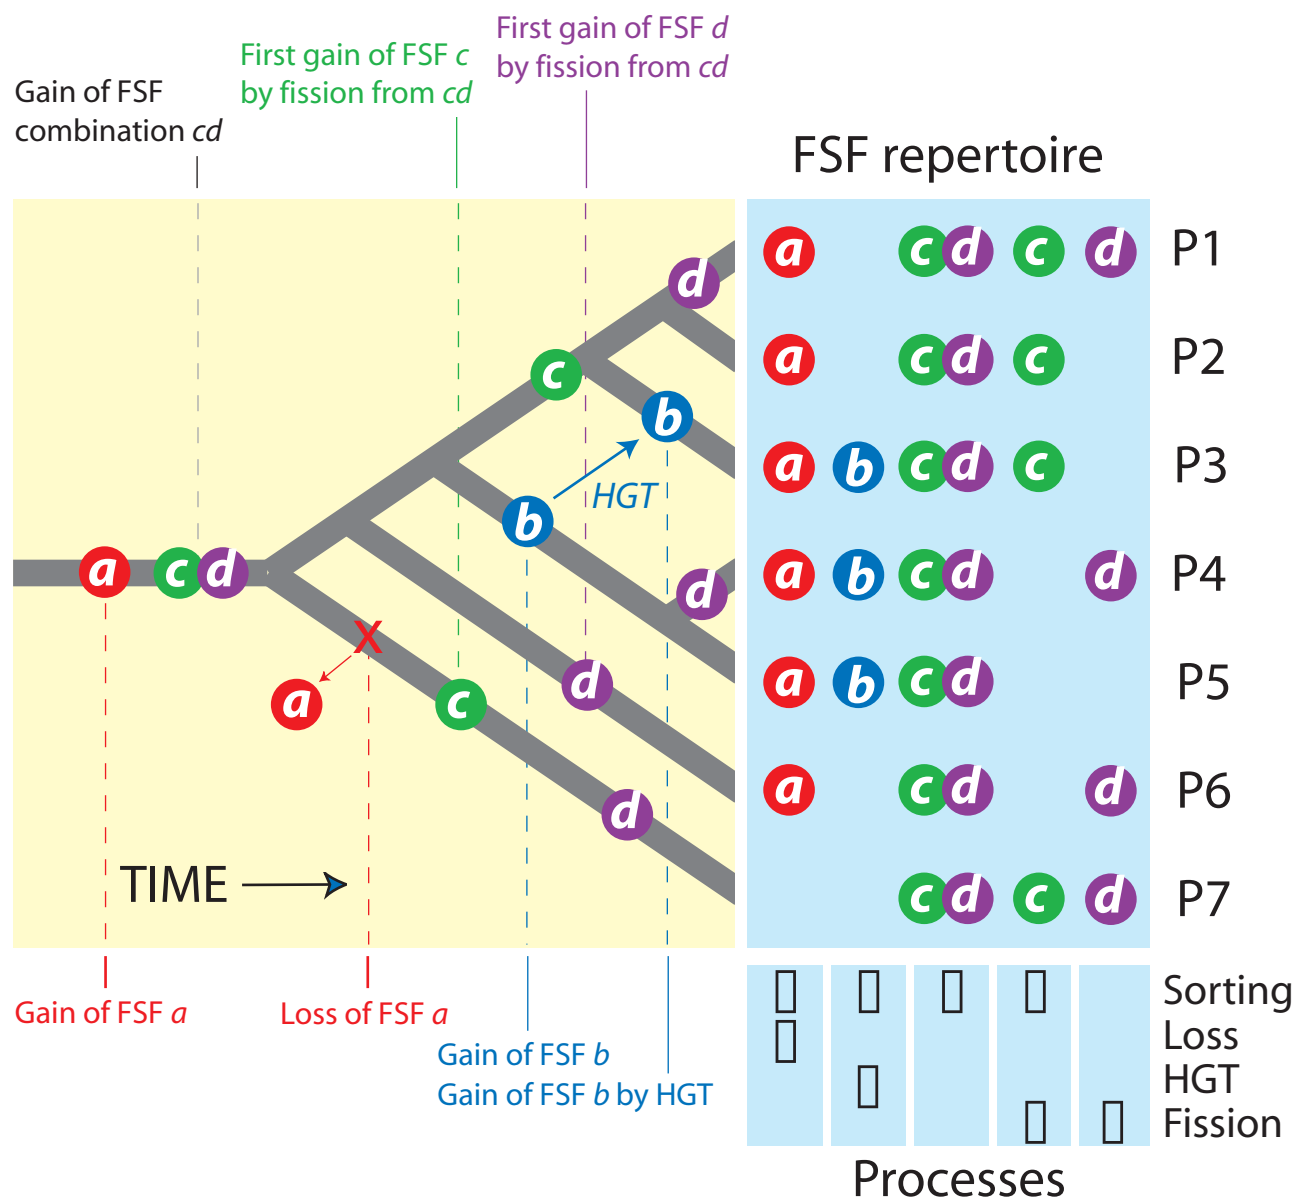

Figure S4

Supplement: Wang_FigS4.pdf [file Wang_FigS4.pdf]
